# Supplementary material
Source: MDPI journal article supplement (https://www.mdpi.com/2072-4292/13/5/836)
Supplement: s1 [file s1]

**Supplementary Information to Vegetation trends, drought severity and land use-cover change over the growing season in semi-arid contexts**

**Table S1: Characteristics of the constituencies in the Central District**

| Administrative code of the constituency | Name of constituency | Area (km <sup>2</sup> ) | Human population (as of 2011 census) |
|-----------------------------------------|----------------------|-------------------------|--------------------------------------|
| 19                                      | Lerala-Maunatlala    | 3228                    | 33743                                |
| 25                                      | Serowe north         | 4608                    | 33404                                |
| 23                                      | Mahalapye west       | 488                     | 32896                                |
| 26                                      | Serowe west          | 15605                   | 25572                                |
| 28                                      | Boteti east          | 16538                   | 37534                                |
| 16                                      | Mmadinare            | 9374                    | 38436                                |
| 21                                      | Sefhare-Ramokgonami  | 4361                    | 31517                                |
| 27                                      | Serowe south         | 3146                    | 35400                                |
| 12                                      | Nkange               | 4129                    | 42402                                |
| 14                                      | Tonota               | 5389                    | 39189                                |
| 13                                      | Shashe west          | 3815                    | 37032                                |
| 15                                      | Bobonong             | 8811                    | 42472                                |
| 29                                      | Boteti west          | 19290                   | 32390                                |
| 22                                      | Mahalapye east       | 5031                    | 25835                                |
| 24                                      | Shoshong             | 10580                   | 29147                                |
| 11                                      | Nata Gweta           | 31162                   | 31533                                |
| 20                                      | Palapye              | 978                     | 40691                                |

Compiled from Parliament.gov.bw

Land cover datasets produced by the European Space Agency (ESA-LC) Climate Change Initiative land cover (CCI-LC) v2.0.7 (Santoro et al., 2017) and Copernicus Climate Change Service (C3S-LC) Mv52 were used for the analysis of vegetation change and drought severity. The land categories were aggregated to match those utilized by the Intergovernmental Panel on Climate Change and the United Nations Convention to Combat Desertification (Table S2).

Table S2: Land cover classification scheme

| Code | Original land categories                                                           | Codes for aggregated class | Name                       |   |           |
|------|------------------------------------------------------------------------------------|----------------------------|----------------------------|---|-----------|
| 50   | Tree cover, broadleaved, evergreen, closed to open (>15%)                          | 1                          | Tree-covered area          |   |           |
| 60   | Tree cover, broadleaved, deciduous, closed to open (>15%)                          |                            |                            |   |           |
| 61   | Tree cover, broadleaved, deciduous, closed (>40%)                                  |                            |                            |   |           |
| 62   | Tree cover, broadleaved, deciduous, open (15-40%)                                  |                            |                            |   |           |
| 70   | Tree cover, needleleaved, evergreen, closed to open (>15%)                         |                            |                            |   |           |
| 71   | Tree cover, needleleaved, evergreen, closed (>40%)                                 |                            |                            |   |           |
| 72   | Tree cover, needleleaved, evergreen, open (15-40%)                                 |                            |                            |   |           |
| 80   | Tree cover, needleleaved, deciduous, closed to open (>15%)                         |                            |                            |   |           |
| 81   | Tree cover, needleleaved, deciduous, closed (>40%)                                 |                            |                            |   |           |
| 82   | Tree cover, needleleaved, deciduous, open (15-40%)                                 |                            |                            |   |           |
| 90   | Tree cover, mixed leaf type (broadleaved and needleleaved)                         |                            |                            |   |           |
| 100  | Mosaic tree and shrub (>50%) / herbaceous cover (<50%)                             |                            |                            |   |           |
| 160  | Tree cover, flooded, fresh or brackish water                                       |                            |                            |   |           |
| 170  | Tree cover, flooded, saline water                                                  |                            |                            |   |           |
| 110  | Mosaic herbaceous cover (>50%) / tree and shrub (<50%)                             |                            |                            | 2 | Grassland |
| 130  | Grassland                                                                          |                            |                            |   |           |
| 120  | Shrubland                                                                          |                            |                            |   |           |
| 121  | Shrubland evergreen                                                                |                            |                            |   |           |
| 122  | Shrubland deciduous                                                                |                            |                            |   |           |
| 150  | Sparse vegetation (tree, shrub, herbaceous cover) (<15%)                           |                            |                            |   |           |
| 151  | Sparse tree (<15%)                                                                 |                            |                            |   |           |
| 152  | Sparse shrub (<15%)                                                                |                            |                            |   |           |
| 153  | Sparse herbaceous cover (<15%)                                                     |                            |                            |   |           |
| 10   | Cropland, rainfed                                                                  | 3                          | Cropland                   |   |           |
| 11   | Herbaceous cover                                                                   |                            |                            |   |           |
| 12   | Tree or shrub cover                                                                |                            |                            |   |           |
| 20   | Cropland, irrigated or post-flooding                                               |                            |                            |   |           |
| 30   | Mosaic cropland (>50%) / natural vegetation (tree, shrub, herbaceous cover) (<50%) |                            |                            |   |           |
| 40   | Mosaic natural vegetation (tree, shrub, herbaceous cover) (>50%) / cropland (<50%) |                            |                            |   |           |
| 180  | Shrub or herbaceous cover, flooded, fresh/saline/brackish water                    | 4                          | Waterbodies, incl. wetland |   |           |
| 210  | Water bodies                                                                       |                            |                            |   |           |
|      |                                                                                    | 5                          | Artificial surface         |   |           |
| 190  | Urban areas                                                                        |                            |                            |   |           |
| 200  | Bare areas                                                                         |                            |                            |   |           |
| 201  | Consolidated bare areas                                                            | 6                          | Otherland                  |   |           |
| 202  | Unconsolidated bare areas                                                          |                            |                            |   |           |

Table S3: Land cover transition matrix in km<sup>2</sup> (2000 - 2018)

|                                  |                    | Target year (2018) land classes (area of change from initial to target time in km <sup>2</sup> ) |                |                |               |                    |                | 2000 Total |
|----------------------------------|--------------------|--------------------------------------------------------------------------------------------------|----------------|----------------|---------------|--------------------|----------------|------------|
|                                  |                    | Tree-covered area                                                                                | Grassland      | Cropland       | Wetland       | Artificial surface | Otherland      |            |
| Initial year (2000) land classes | Tree-covered area  | <b>11486.43</b>                                                                                  | 28.89          | 1424.07        | 3.33          | 3.69               | 4073.49        | 17088.52   |
|                                  | Grassland          | 9215.28                                                                                          | <b>8205.03</b> | 4485.42        | 43.02         | 123.39             | 90526.23       | 112850.31  |
|                                  | Cropland           | 949.68                                                                                           | 39.42          | <b>6036.57</b> | 0.18          | 2.43               | 2200.14        | 9285.03    |
|                                  | Wetland            | 2.25                                                                                             | 12.42          | 1.98           | <b>138.96</b> | 0.36               | 45.63          | 264.89     |
|                                  | Artificial surface | 2.70                                                                                             | 1.89           | 0.81           | 0.18          | <b>66.33</b>       | 5.13           | 110.40     |
|                                  | Otherland          | 3.60                                                                                             | 773.28         | 7.83           | 35.10         | 3.33               | <b>7727.76</b> | 8577.08    |
|                                  | <b>2018 total</b>  | 21659.94                                                                                         | 9060.93        | 11956.68       | 220.77        | 199.53             | 104578.38      | 148176.23  |

Note: Persistence is shown in bold.

To map drought severity in each constituency over the entire time-series, there was the need to decide on the best option for visualization and analyzing drought frequency. Three VCI values were used for analysis. These are the VCI modal values (majority) representing the most occurring VCI values recorded in a constituency during a certain growing season (refer to the paper Fig. 8), VCI minimum values representing the lowest VCIs recorded in a constituency for a certain growing season (Fig. S1), and the mean values representing the average VCIs recorded in a constituency for a certain growing season (Fig. S2).

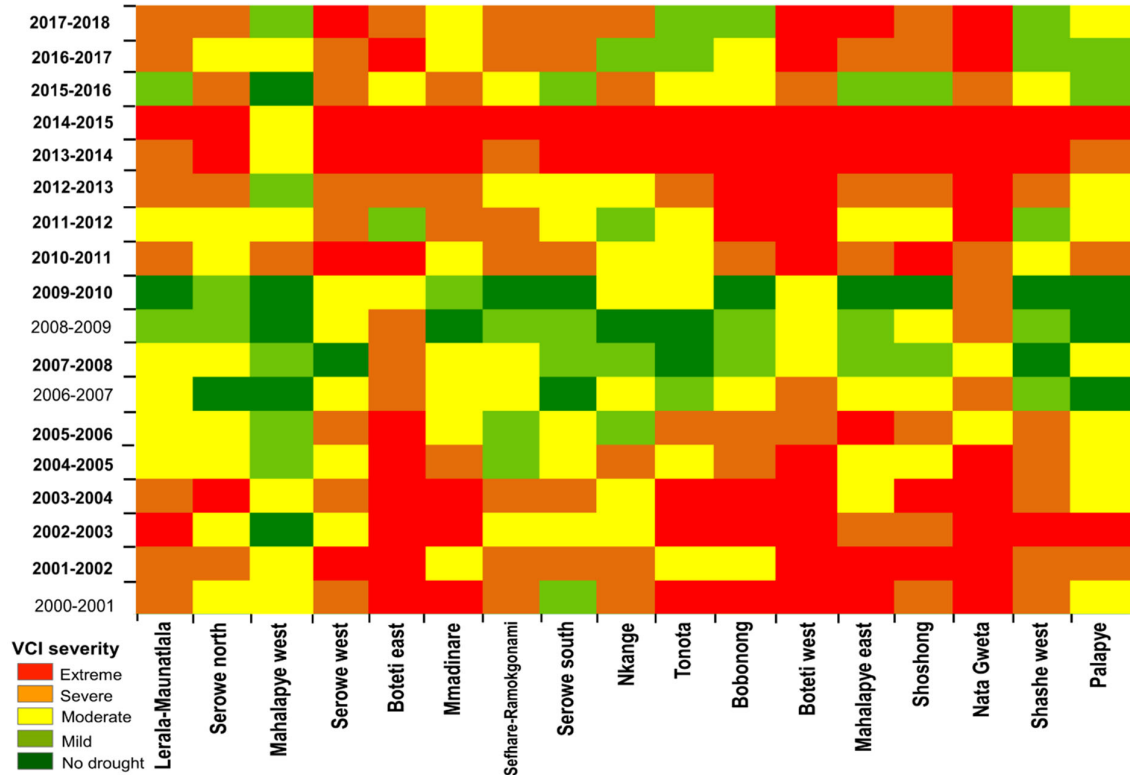

**Figure S1:** VCI minimum value heatmap of drought severity at constituency level during the growing seasons of 2000-2001 to 2017-2018.

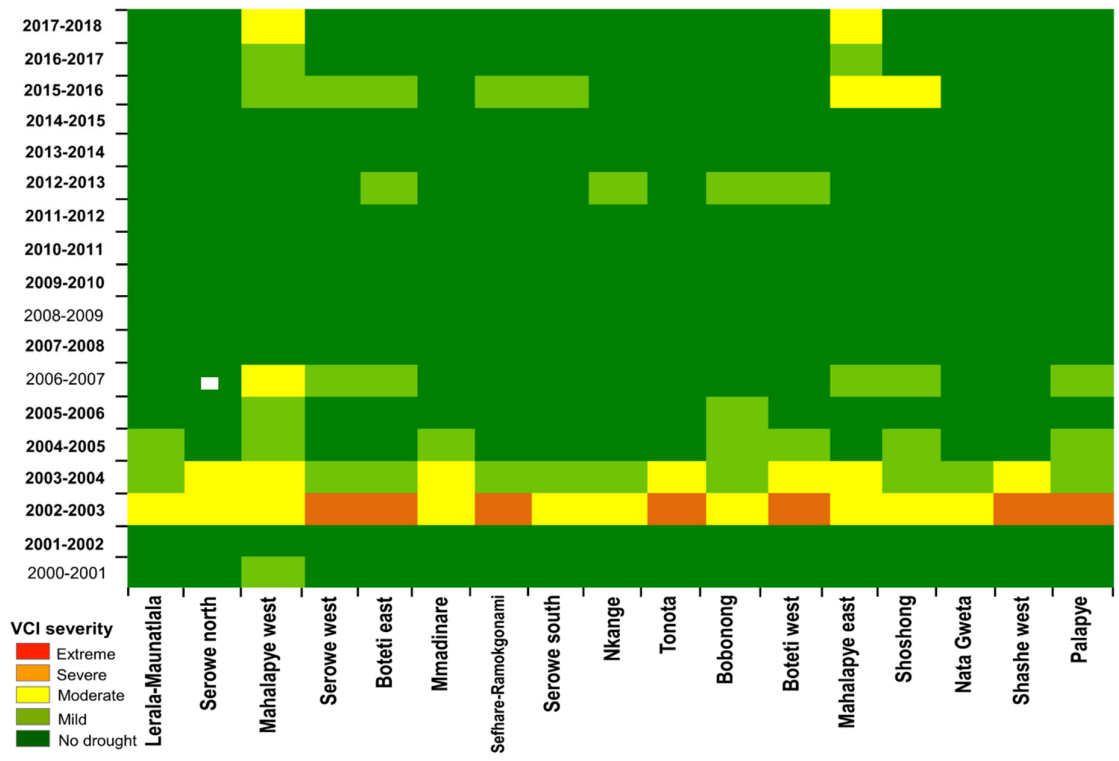

**Figure S2:** VCI mean value heatmap of drought severity at constituency level during the growing seasons of 2000-2001 to 2017-2018.
